# Supplementary material for: Discovering Disease Associations by Integrating Electronic Clinical Data and Medical Literature
Source: PubMed Central journal article supplement (PMC3121722; doi:10.1371/journal.pone.0021132), 2011-06-23
Supplement: pone.0021132.s003.pdf [file pone.0021132.s003.pdf]

ADAMS

File Tools Help

Case: Kaposi's Sarcoma Control: Influenza Search Networks... Export...

Time before: [ ] No restriction Time after: [ ] No restriction Bootstraps: 3000 FDR cutoff: 0.05

| Id | ICD-9 co... | ICD-9 de... | Case set         | Control ... | Have dis... | Total pa... | Incidenc... | Have dis... | Total pa... | Incidence (control ... | Odds ratio | Hypergeometric    | FDR | Days be... | Days after | Bootstr... |
|----|-------------|-------------|------------------|-------------|-------------|-------------|-------------|-------------|-------------|------------------------|------------|-------------------|-----|------------|------------|------------|
| 1  | 176.0       | Kaposi's... | Kaposi's Sarcoma | Influenza   | 75          | 221         | 0.33936...  | 0           | 2582        | 0.0                    | -1.0       | 3.126867638710... | 0.0 | -1         | -1         | 100000     |
| 2  | 042         | Human i...  | Kaposi's Sarcoma | Influenza   | 65          | 221         | 0.29411...  | 51          | 2582        | 0.0197521301316...     | 14.8904... | 1.555972944694... | 0.0 | -1         | -1         | 100000     |
| 3  | 182.0       | Maligna...  | Kaposi's Sarcoma | Influenza   | 39          | 221         | 0.17647...  | 2           | 2582        | 0.0007745933384...     | 227.823... | 2.492006284147... | 0.0 | -1         | -1         | 100000     |
| 4  | 199.1       | Other m...  | Kaposi's Sarcoma | Influenza   | 53          | 221         | 0.23981...  | 34          | 2582        | 0.0131680867544...     | 18.2121... | 1.247170482759... | 0.0 | -1         | -1         | 100000     |
| 5  | 174.9       | Maligna...  | Kaposi's Sarcoma | Influenza   | 36          | 221         | 0.16289...  | 23          | 2582        | 0.0089078233927...     | 18.2868... | 3.599986511320... | 0.0 | -1         | -1         | 100000     |
| 6  | 179         | Maligna...  | Kaposi's Sarcoma | Influenza   | 24          | 221         | 0.10859...  | 2           | 2582        | 0.0007745933384...     | 140.199... | 2.839936509428... | 0.0 | -1         | -1         | 100000     |
| 7  | V58.11      | Encount...  | Kaposi's Sarcoma | Influenza   | 29          | 221         | 0.13122...  | 18          | 2582        | 0.0069713400464...     | 18.8230... | 2.249324674157... | 0.0 | -1         | -1         | 100000     |
| 8  | 176.1       | Kaposi's... | Kaposi's Sarcoma | Influenza   | 20          | 221         | 0.09049...  | 2           | 2582        | 0.0007745933384...     | 116.832... | 7.616026771230... | 0.0 | -1         | -1         | 100000     |
| 9  | 197.7       | Maligna...  | Kaposi's Sarcoma | Influenza   | 20          | 221         | 0.09049...  | 2           | 2582        | 0.0007745933384...     | 116.832... | 7.616026771230... | 0.0 | -1         | -1         | 100000     |
| 10 | 197.0       | Second...   | Kaposi's Sarcoma | Influenza   | 22          | 221         | 0.09954...  | 6           | 2582        | 0.0023237800154...     | 42.8386... | 4.859269276399... | 0.0 | -1         | -1         | 100000     |
| 11 | 171.9       | Maligna...  | Kaposi's Sarcoma | Influenza   | 20          | 221         | 0.09049...  | 3           | 2582        | 0.0011618900077...     | 77.8883... | 5.437182302811... | 0.0 | -1         | -1         | 100000     |
| 12 | 183.0       | Maligna...  | Kaposi's Sarcoma | Influenza   | 19          | 221         | 0.08597...  | 2           | 2582        | 0.0007745933384...     | 110.990... | 9.539361636830... | 0.0 | -1         | -1         | 100000     |
| 13 | 176.4       | Kaposi's... | Kaposi's Sarcoma | Influenza   | 17          | 221         | 0.07692...  | 0           | 2582        | 0.0                    | -1.0       | 9.817933288696... | 0.0 | -1         | -1         | 100000     |
| 14 | V10.42      | Persona...  | Kaposi's Sarcoma | Influenza   | 17          | 221         | 0.07692...  | 2           | 2582        | 0.0007745933384...     | 99.3076... | 1.454678905914... | 0.0 | -1         | -1         | 100000     |
| 15 | 176.8       | Kaposi's... | Kaposi's Sarcoma | Influenza   | 14          | 221         | 0.06334...  | 0           | 2582        | 0.0                    | -1.0       | 2.433923379058... | 0.0 | -1         | -1         | 100000     |
| 16 | 285.9       | Anemia ...  | Kaposi's Sarcoma | Influenza   | 68          | 221         | 0.30769...  | 252         | 2582        | 0.0975987606506...     | 3.15262... | 2.744196752868... | 0.0 | -1         | -1         | 100000     |
| 17 | V08         | Asympto...  | Kaposi's Sarcoma | Influenza   | 32          | 221         | 0.14479...  | 47          | 2582        | 0.0182029434546...     | 7.95455... | 2.896032577538... | 0.0 | -1         | -1         | 100000     |
| 18 | 198.89      | Second...   | Kaposi's Sarcoma | Influenza   | 16          | 221         | 0.07239...  | 3           | 2582        | 0.0011618900077...     | 62.3107... | 1.042912599987... | 0.0 | -1         | -1         | 100000     |
| 19 | 112.0       | Candidi...  | Kaposi's Sarcoma | Influenza   | 33          | 221         | 0.14932...  | 62          | 2582        | 0.0240123934934...     | 6.21850... | 2.037250330651... | 0.0 | -1         | -1         | 100000     |
| 20 | E933.1      | Antineo...  | Kaposi's Sarcoma | Influenza   | 24          | 221         | 0.10859...  | 30          | 2582        | 0.0116189000774...     | 9.34660... | 1.691508464367... | 0.0 | -1         | -1         | 100000     |
| 21 | 171.0       | Maligna...  | Kaposi's Sarcoma | Influenza   | 11          | 221         | 0.04977...  | 0           | 2582        | 0.0                    | -1.0       | 5.796387887354... | 0.0 | -1         | -1         | 100000     |
| 22 | 171.6       | Maligna...  | Kaposi's Sarcoma | Influenza   | 11          | 221         | 0.04977...  | 0           | 2582        | 0.0                    | -1.0       | 5.796387887354... | 0.0 | -1         | -1         | 100000     |
| 23 | E878.8      | Other s...  | Kaposi's Sarcoma | Influenza   | 32          | 221         | 0.14479...  | 70          | 2582        | 0.0271107668474...     | 5.34091... | 1.356439256670... | 0.0 | -1         | -1         | 100000     |
| 24 | 198.5       | Second...   | Kaposi's Sarcoma | Influenza   | 15          | 221         | 0.06787...  | 7           | 2582        | 0.0027110766847...     | 25.0355... | 1.863819652067... | 0.0 | -1         | -1         | 100000     |
| 25 | 799.4       | Cachexia    | Kaposi's Sarcoma | Influenza   | 20          | 221         | 0.09049...  | 22          | 2582        | 0.0085205267234...     | 10.6211... | 4.061425089279... | 0.0 | -1         | -1         | 100000     |
| 26 | 174.8       | Maligna...  | Kaposi's Sarcoma | Influenza   | 14          | 221         | 0.06334...  | 6           | 2582        | 0.0023237800154...     | 27.2609... | 6.132363937326... | 0.0 | -1         | -1         | 100000     |
| 27 | 233.0       | Carcino...  | Kaposi's Sarcoma | Influenza   | 11          | 221         | 0.04977...  | 1           | 2582        | 0.0003872966692...     | 128.515... | 6.476093257801... | 0.0 | -1         | -1         | 100000     |
| 28 | 614.6       | Pelvic p... | Kaposi's Sarcoma | Influenza   | 13          | 221         | 0.05882...  | 5           | 2582        | 0.0019364833462...     | 30.3764... | 1.954175035699... | 0.0 | -1         | -1         | 100000     |
| 29 | 197.6       | Second...   | Kaposi's Sarcoma | Influenza   | 10          | 221         | 0.04524...  | 1           | 2582        | 0.0003872966692...     | 116.832... | 7.860286569697... | 0.0 | -1         | -1         | 100000     |
| 30 | 158.0       | Maligna...  | Kaposi's Sarcoma | Influenza   | 9           | 221         | 0.04072...  | 0           | 2582        | 0.0                    | -1.0       | 1.011198604264... | 0.0 | -1         | -1         | 100000     |
| 31 | 176.3       | Kaposi's... | Kaposi's Sarcoma | Influenza   | 9           | 221         | 0.04072...  | 0           | 2582        | 0.0                    | -1.0       | 1.011198604264... | 0.0 | -1         | -1         | 100000     |
| 32 | 176.5       | Kaposi's... | Kaposi's Sarcoma | Influenza   | 9           | 221         | 0.04072...  | 0           | 2582        | 0.0                    | -1.0       | 1.011198604264... | 0.0 | -1         | -1         | 100000     |
| 33 | 197.2       | Second...   | Kaposi's Sarcoma | Influenza   | 9           | 221         | 0.04072...  | 0           | 2582        | 0.0                    | -1.0       | 1.011198604264... | 0.0 | -1         | -1         | 100000     |
| 34 | V10.3       | Persona...  | Kaposi's Sarcoma | Influenza   | 18          | 221         | 0.08144...  | 24          | 2582        | 0.0092951200619...     | 8.76244... | 4.554129422179... | 0.0 | -1         | -1         | 100000     |
| 35 | 401.9       | Unspeci...  | Kaposi's Sarcoma | Influenza   | 98          | 221         | 0.44343...  | 633         | 2582        | 0.2451587916343...     | 1.80878... | 6.702776400516... | 0.0 | -1         | -1         | 100000     |
| 36 | 288.0       | Agranul...  | Kaposi's Sarcoma | Influenza   | 18          | 221         | 0.08144...  | 25          | 2582        | 0.0096824167312...     | 8.41194... | 7.290711438566... | 0.0 | -1         | -1         | 100000     |
| 37 | 174.4       | Maligna...  | Kaposi's Sarcoma | Influenza   | 8           | 221         | 0.03619...  | 0           | 2582        | 0.0                    | -1.0       | 1.326901454891... | 0.0 | -1         | -1         | 100000     |
| 38 | 284.8       | Other s...  | Kaposi's Sarcoma | Influenza   | 15          | 221         | 0.06787...  | 16          | 2582        | 0.0061967467079...     | 10.9530... | 1.721027228818... | 0.0 | -1         | -1         | 100000     |
| 39 | 288.9       | Unspeci...  | Kaposi's Sarcoma | Influenza   | 10          | 221         | 0.04524...  | 3           | 2582        | 0.0011618900077...     | 38.9441... | 1.772716290013... | 0.0 | -1         | -1         | 100000     |
| 40 | 789.30      | Abdomi...   | Kaposi's Sarcoma | Influenza   | 12          | 221         | 0.05429...  | 8           | 2582        | 0.0030983733539...     | 17.5248... | 3.097239128893... | 0.0 | -1         | -1         | 100000     |

Finished loading data into table.

**Supporting Figure S3 .** The interface of ADAMS application, where the case and control cohorts are selected. ADAMS is also able to limit time intervals for data. The desired number of bootstraps is also entered here. Clicking on the “Search” button in ADAMS begins the process of statistical analysis.
