# Supplementary material for: Discovering Disease Associations by Integrating Electronic Clinical Data and Medical Literature
Source: PubMed Central journal article supplement (PMC3121722; doi:10.1371/journal.pone.0021132), 2011-06-23
Supplement: pone.0021132.s009.pdf [file pone.0021132.s009.pdf]

**Supporting Table S6 .** Significantly associated diseases with Kawasaki disease, compared to the PTSD control cohort (FDR < 0.05). If there are no patients with a diagnosis code in the control groups, odds ratio is not calculated (i.e. N/A).

| ICD-9  | Description                                                                          | Odds ratio | P-value | FDR    |
|--------|--------------------------------------------------------------------------------------|------------|---------|--------|
| 079.89 | Other specified viral infection                                                      | 15.79      | <0.001  | <0.001 |
| 079.99 | Unspecified viral infection                                                          | 3.82       | <0.001  | <0.001 |
| 372.30 | Conjunctivitis unspecified                                                           | 9.42       | <0.001  | <0.001 |
| 382.9  | Unspecified otitis media                                                             | 6.21       | <0.001  | <0.001 |
| 466.19 | Acute bronchiolitis due to other infectious organisms                                | 39.09      | <0.001  | <0.001 |
| 714.30 | Chronic or unspecified polyarticular juvenile rheumatoid arthritis                   | 78.18      | <0.001  | <0.001 |
| 780.6  | Fever and other physiologic disturbances of temperature regulation                   | 6.39       | <0.001  | <0.001 |
| 780.60 | Fever, unspecified                                                                   | 14.43      | <0.001  | <0.001 |
| 782.1  | Rash and other nonspecific skin eruption                                             | 4.61       | <0.001  | <0.001 |
| 034.0  | Streptococcal sore throat                                                            | 8.75       | <0.001  | <0.001 |
| 519.9  | Unspecified disease of respiratory system                                            | 30.07      | <0.001  | <0.001 |
| 786.00 | Respiratory abnormality unspecified                                                  | 7.65       | <0.001  | <0.001 |
| 691.8  | Other atopic dermatitis and related conditions                                       | 7.11       | <0.001  | <0.001 |
| 057.9  | Viral exanthem unspecified                                                           | 42.10      | <0.001  | <0.001 |
| 074.0  | Herpangina                                                                           | N/A        | <0.001  | <0.001 |
| 414.11 | Aneurysm of coronary vessels                                                         | N/A        | <0.001  | <0.001 |
| 691.0  | Diaper or napkin rash                                                                | N/A        | <0.001  | <0.001 |
| 746.85 | Coronary artery anomaly congenital                                                   | N/A        | <0.001  | <0.001 |
| 034.1  | Scarlet fever                                                                        | 36.08      | <0.001  | <0.001 |
| 315.39 | Other developmental speech disorder                                                  | 36.08      | <0.001  | <0.001 |
| 079.2  | Coxsackie virus infection in conditions classified elsewhere and of unspecified site | N/A        | <0.001  | <0.001 |
| 289.3  | Lymphadenitis unspecified except mesenteric                                          | N/A        | <0.001  | <0.001 |
| 446.0  | Polyarteritis nodosa                                                                 | N/A        | <0.001  | <0.001 |
| 462    | Acute pharyngitis                                                                    | 2.28       | <0.001  | 0.003  |
| 423.9  | Unspecified disease of pericardium                                                   | 10.52      | <0.001  | 0.003  |
| 464.4  | Croup                                                                                | 30.07      | <0.001  | 0.005  |
| 299.00 | Autistic disorder current or active state                                            | 30.07      | <0.001  | 0.005  |
| 747.0  | Patent ductus arteriosus                                                             | N/A        | <0.001  | 0.005  |
| 746.1  | Tricuspid atresia and stenosis congenital                                            | N/A        | <0.001  | 0.005  |
| 787.03 | Vomiting alone                                                                       | 2.38       | <0.001  | 0.007  |
| 783.40 | Unspecified lack of normal physiological development                                 | 24.06      | 0.002   | 0.020  |
| 446.5  | Giant cell arteritis                                                                 | 24.06      | 0.002   | 0.020  |
| 746.9  | Unspecified congenital anomaly of heart                                              | 24.06      | 0.002   | 0.020  |
| 078.0  | Molluscum contagiosum                                                                | 10.02      | 0.002   | 0.030  |
| 474.10 | Hypertrophy of tonsil with adenoids                                                  | 10.02      | 0.002   | 0.030  |
| 314.1  | Hyperkinesis of childhood with developmental delay                                   | 10.02      | 0.002   | 0.030  |
| 786.06 | Tachypnea                                                                            | 10.02      | 0.002   | 0.030  |
| 372.39 | Other conjunctivitis                                                                 | N/A        | 0.003   | 0.034  |
| 780.31 | Febrile convulsions                                                                  | N/A        | 0.003   | 0.034  |
| 446.7  | Takayasu's disease                                                                   | N/A        | 0.003   | 0.034  |
| 447.8  | Other specified disorders of arteries and arterioles                                 | N/A        | 0.003   | 0.034  |
| 315.5  | Mixed development disorder                                                           | N/A        | 0.003   | 0.034  |
| 008.61 | Enteritis due to rotavirus                                                           | N/A        | 0.003   | 0.034  |
| 774.6  | Unspecified fetal and neonatal jaundice                                              | N/A        | 0.003   | 0.034  |
| 745.5  | Ostium secundum type atrial septal defect                                            | N/A        | 0.003   | 0.034  |
| 466.11 | Acute bronchiolitis due to respiratory syncytial virus (rsv)                         | N/A        | 0.003   | 0.034  |
| 277.00 | Cystic fibrosis without meconium ileus                                               | N/A        | 0.003   | 0.034  |
| 428.9  | Heart failure unspecified                                                            | N/A        | 0.003   | 0.034  |
| 767.19 | Other injury to scalp due to birth trauma                                            | N/A        | 0.003   | 0.034  |
| 710.0  | Systemic lupus erythematosus                                                         | 3.87       | 0.003   | 0.035  |
| 112.0  | Candidiasis of mouth                                                                 | 4.01       | 0.004   | 0.036  |
| 783.41 | Failure to thrive                                                                    | 7.52       | 0.004   | 0.041  |
| 684    | Impetigo                                                                             | 12.03      | 0.005   | 0.050  |
